# Supplementary material for: Comparative genomic analysis reveals genetic features related to the virulence of Bacillus cereus FORC_013
Source: Gut Pathog. 2017 May 15;9:29. doi: 10.1186/s13099-017-0175-z (PMC5433235; doi:10.1186/s13099-017-0175-z)

**Additional Files**

**Comparative genomic analysis reveals genetic features related to the virulence of *Bacillus cereus* FORC_013**

Hyun-Jin Koo1, Sojin Ahn2,3, Han Young Chung3,4, Suyeon Kim3,4, Kwondo Kim2, Sangryeol Ryu3,4, Ju-Hoon Lee3,5, Sang Ho Choi3,4* and Heebal Kim1,2,3*

**Author details**

1Department of Agricultural Biotechnology and Research Institute of Agriculture and Life Sciences, Seoul National University, Seoul, Republic of Korea

2Interdisciplinary Program in Bioinformatics, Seoul National University, Seoul, Republic of Korea

3Food-borne Pathogen Omics Research Center (FORC), Seoul National University, Seoul, Korea

4Department of Agricultural Biotechnology, Center for Food Safety and Toxicology, Seoul National University, Seoul, Republic of Korea

5Department of Food Science and Biotechnology, Institute of Life Science and Resources, Kyung Hee University, Yongin, Republic of Korea

***Correspondence:**

[heebal@snu.ac.kr](mailto:heebal@snu.ac.kr); choish@snu.ac.kr

1Department of Agricultural Biotechnology and Research Institute of Agriculture and Life Sciences, Seoul National University, Seoul, Republic of Korea

4Department of Agricultural Biotechnology, Center for Food Safety and Toxicology, Seoul National University, Seoul, Republic of Korea

**Material and Methods**

**Cytotoxicity test**

Cytotoxicity test of FORC_013 strain was performed via checking cytoplasmic lactated dehydrogenase (LDH) activity which is observed from the human epithelial INT-407 cells that were lysed by 2% Triton X 100. As mentioned previously, the INT-407 cells were mature in minimum essential medium containing 1% (v/v) fetal bovine serum (MEMF) (Gibco-BRL, Gaithersburg, MD) in 96-well culture dishes (Nunc, Roskilde, Denmark) [[1](#_ENREF_1)]. Each well of the INT-407 2 × 104 cells was infected with *B. cereus* FORC_013 and ATCC 14579 as positive control at various multiplicities of infections (MOIs) for 3hours. The LDH releasing activity into the supernatant was determined via a cytotoxicity detection kit (Roche, Mannheim, Germany).

**References**

1. Kim S, Bang YJ, Kim D, Lim JG, Oh MH, Choi SH: **Distinct characteristics of OxyR2, a new OxyR‐type regulator, ensuring expression of Peroxiredoxin 2 detoxifying low levels of hydrogen peroxide in Vibrio vulnificus**. *Molecular microbiology* 2014, **93**(5):992-1009.

**Additional file 1: Table S1. Summary of *B. cereus* FORC_013 genome.**

| **Property** | **Term** |
| --- | --- |
| Finishing quality | Finished |
| Libraries used | PacBio SMRTbell™ library |
| Number of SMRT cells | 2 |
| Sequencing platforms | PacBio RS II sequencer |
| Assemblers | PacBio SMRT analysis 3.0 |
| Gene calling method | PROKKA, and RAST |
| Number of reads | 109,880 (PacBio_20K) |
| N50 read length | 7,373 |
| Average genome coverage | 71.39x |
| Contigs no. | 2 (chromosome) |
| 1 (plasmid) |
| Scaffolds no. | 1 (chromosome) |
| 1 (plasmid) |
| N50 contig length | 2,948,960 |
| Chromosome length (bp) | 5,418,913 bps (chromosome)  259,749 bps (plasmid) |
| ORFs | 5,424 |
| Locus Tag | FORC13 |
| Genbank ID | CP011145, CP011146 |
| BIOPROJECT | PRJNA279901 |
| Source Material Identifier | FORC_013 |

**Additional file 1: Fig S1. Cytotoxicity analysis for two strains of *B. cereus*** The cytotoxicity analyses of FORC_013 strain were compared with ATCC 14579 strain by measuring the activity of cytoplasmic lactate dehydrogenase (LDH). INT-407 cells were infected with FORC_013 or ATCC 14579 at various multiplicities of infection (MOIs) for 3 h. Cytotoxicity was determined as the percentage of LDH leakage using the amount of LDH from the cells that were completely lysed by 2% Triton X-100. Error bars represent the standard errors of the means (SEM).


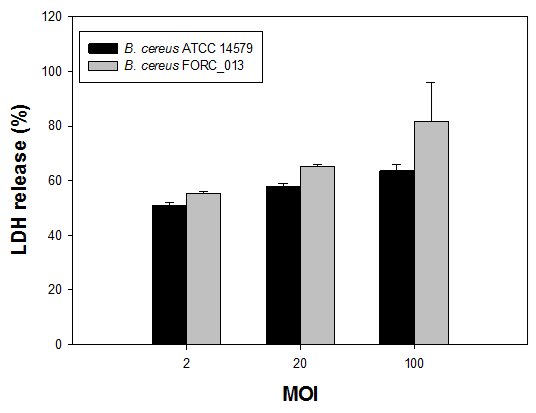


**Additional file 1: Table S2. Positively selected genes predicted in the branch model and related data for *B. cereus* FORC_013**

| **Locus** | **Function** | **p-value** | **ωF.G.** | **ωB.G.** |
| --- | --- | --- | --- | --- |
| FORC13_0586 | YtxC-like family protein | 2.04E-02 | 1.03927 | 0.04993 |
| FORC13_0734 | Post-transcriptional regulator ComN | 4.62E-02 | 1.0206 | 0.05055 |
| FORC13_0851 | Cytochrome c550 | 2.09E-05 | 1.00565 | 0.07063 |
| FORC13_1405 | HTH-type transcriptional regulator NorG | 3.91E-11 | 1.09935 | 0.05774 |
| FORC13_3326 | Putative HTH-type transcriptional regulator | 5.13E-03 | 1.11237 | 0.03878 |
| FORC13_3534 | Flagellar hook-basal body complex protein FliE | 2.93E-02 | 1.0579 | 0.10196 |
| FORC13_3811 | putative murein peptide carboxypeptidase | 7.82E-03 | 1.21275 | 0.11958 |
| FORC13_5156 | HTH-type transcriptional regulator GltC | 4.76E-21 | 1.18227 | 0.0696 |
| FORC13_5251 | ATP synthase subunit a | 1.41E-02 | 1.05517 | 0.12087 |
| FORC13_5350 | Regulatory protein YeiL | 2.27E-04 | 2.89351 | 0.13594 |
| FORC13_5384 | Superoxide dismutase (Mn) 2 | 3.19E-03 | 1.18661 | 0.04302 |
| FORC13_5392 | Oligoendopeptidase F | 1.52E-03 | 1.28818 | 0.07277 |

**Additional file 1: Table S3. Positively selected genes predicted in the branch-site model and related data for *B. cereus* FORC_013**

| **Function** | Mycinamicin III 3''-O-methyltransferase | Putative efflux system component YknX |
| --- | --- | --- |
| **Locus position** | FORC13_3977 | FORC13_5192 |
| **Peptide length** | 258 | 395 |
| **p-Value** | 8.77E-20 | 2.04E-02 |
| **ω2 F.G.** | 999.00 | 74.42 |
| **ω2a B.G.** | 0.0009 | 0.0185 |
| **Proportion of site class 2a** | 0.893 | 0.934 |
| **Bayes Empirical Bayes** | 0.967* | 0.975* |
| **Position** | 190 | 153 |
| **FORC_013** | N | I |
| **Other strains** | D | V |

**Additional file 1: Fig S2. Pan-genome- each strain is represented by a vertical line** (a) pan-genome structure for 30 *B. cereus* species (b) core genome and pan genome (c) proportion of core, dispensable, and unique genes.


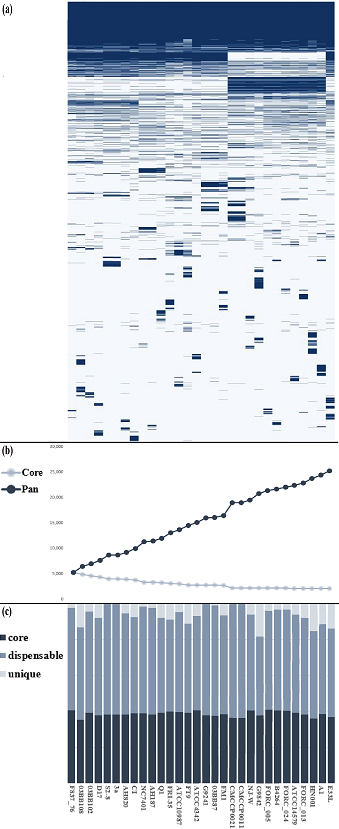

Supplement: Supplementary file 1 — Additional file 1. Additional Tables and Figures. [file 13099_2017_175_MOESM1_ESM.docx]
